# Supplementary material for: Clinicopathological and prognostic value of lncRNAs expression in gastric cancer: A field synopsis of observational studies and databases validation
Source: PubMed Central journal article supplement — Medicine (Baltimore). 2022 Oct 7;101(40):e30817. doi: 10.1097/MD.0000000000030817 (PMC9543081; doi:10.1097/md.0000000000030817), 2022-10-07
Supplement: medi-101-e30817-s001.pdf [file medi-101-e30817-s001.pdf]

**Supplementary Table 1 Characteristics of included studies.**

| First author    | Year | Country | Pathological type | Expression sit        | Sample  | OS Size | DFS/PFS/DSS /RFS Size | Clinical features | Assay   | Follow-up (Months) | Cut-off | Outcome |
|-----------------|------|---------|-------------------|-----------------------|---------|---------|-----------------------|-------------------|---------|--------------------|---------|---------|
| Zhu et al[1]    | 2020 | China   | gastric cancer    | LINC00963             | Tissue  | 50      |                       | NA                | qRT-PCR | 60                 | Median  | SC      |
| Yue et al[2]    | 2020 | China   | gastric cancer    | LncRNA RPPH1          | Tissue  | 60      |                       | NA                | qRT-PCR | 40                 | Normal  | SC      |
| Fan et al [3]   | 2020 | China   | gastric cancer    | lnc RNA CCDC144NL-AS1 | Tissue  | 72      |                       | NA                | qRT-PCR | 150                | Normal  | HR/SC   |
| Zhong et al[4]  | 2020 | China   | gastric cancer    | LINC00242             | Tissue  | 68      |                       | NA                | qRT-PCR | 80                 | Normal  | SC      |
| Wang et al [5]  | 2020 | China   | gastric cancer    | lncRNA LIFR-AS1       | Tissue  | 265     | DFS,265               | Y                 | qRT-PCR | 120                | Median  | HR/SC   |
| Wang et al[6]   | 2020 | China   | gastric cancer    | lncRNA RNA RGMB-AS1   | Tissue  | 67      |                       | NA                | qRT-PCR | 60                 | Median  | SC      |
| Tang et al[7]   | 2020 | China   | gastric cancer    | lncRNA TPT1-AS1       | Tissue  | 76      |                       | Y                 | qRT-PCR | 60                 | Median  | HR/SC   |
| Ai et al[8]     | 2020 | China   | gastric cancer    | LINC00858             | Tissue  | 189     | 189,DFS               | NA                | qRT-PCR | 60                 | Normal  | HR/SC   |
| Chen et al[9]   | 2020 | China   | gastric cancer    | lncRNA ERICH3-AS1     | Tissue  | 373     | 373,DFS               | Y                 | qRT-PCR | 126                | Median  | HR/SC   |
| You Shuai[10]   | 2020 | China   | gastric cancer    | lncRNA MNX1-AS1       | Tissue  | 87      | 87,DFS                | NA                | qRT-PCR | 36                 | Median  | SC      |
| Rui Zhang[11]   | 2019 | China   | gastric cancer    | lncRNA SNHG12         | Tissue  | 335     |                       | Y                 | qRT-PCR | 47                 | Median  | HR/SC   |
| Jijun Yan[12]   | 2019 | China   | gastric cancer    | LncRNA LINC00470      | Tissue  | 60      |                       | NA                | qRT-PCR | 66                 | Median  | SC      |
| Zhang et al[13] | 2019 | China   | gastric cancer    | LncRNA PTCSC3         | Plasma  | 68      |                       | NA                | qRT-PCR | 60                 | Normal  | SC      |
| Qu et al[14]    | 2019 | China   | gastric cancer    | LncRNA AOC4P          | Tissues | 80      | DFS,80                | NA                | qRT-PCR | 60                 | Normal  | SC      |
| He et al[15]    | 2019 | China   | gastric cancer    | lncRNA UCA1           | Tissues | 60      |                       | NA                | qRT-PCR | 61                 | Median  | SC      |
| Zhai et al[16]  | 2019 | China   | gastric cancer    | lncRNA BCYRN1         | Tissues | 127     |                       | Y                 | qRT-PCR | 96                 | Median  | HR/SC   |
| Fu et al[17]    | 2019 | China   | gastric cancer    | LncRNA E2F            | Tissues | 64      |                       | NA                | qRT-PCR | 60                 | Normal  | SC      |
| Xuan et al[18]  | 2019 | China   | gastric cancer    | LncRNA SNHG3          | Tissues | 60      |                       | NA                | qRT-PCR | 72                 | Normal  | SC      |
| Xu et al[19]    | 2019 | China   | gastric cancer    | LncRNA LINC01225      | Tissues | 109     |                       | NA                | qRT-PCR | 48                 | Median  | SC      |
| Wang et al[20]  | 2019 | China   | gastric cancer    | LncRNA CASC19         | Tissues | 351     |                       | Y                 | qRT-PCR | 124                | Median  | HR/SC   |
| Zheng et al[21] | 2019 | China   | gastric cancer    | LncRNA RNA KRT19P3    | Tissues | 84      |                       | Y                 | qRT-PCR | 48                 | Normal  | HR/SC   |
| Shi et al[22]   | 2019 | China   | gastric cancer    | LncRNA CADM1-AS1      | Tissues | 120     |                       | Y                 | qRT-PCR | 60                 | Normal  | HR/SC   |
| Nie et al[23]   | 2019 | China   | gastric cancer    | lncRNA p4516          | Tissues | 60      |                       | Y                 | qRT-PCR | 61                 | Normal  | HR/SC   |
| Guo et al[24]   | 2019 | China   | gastric cancer    | LncRNA PCAT-1         | Tissues | 38      |                       | NA                | qRT-PCR | 60                 | Normal  | SC      |
| Li et al[25]    | 2019 | China   | gastric cancer    | lncRNA CASC2          | Tissues | 37      |                       | NA                | qRT-PCR | 66                 | Normal  | SC      |
| Zhao et al[26]  | 2019 | China   | gastric cancer    | lncRNA RNA SNHG12     | Tissues | 56      |                       | NA                | qRT-PCR | 60                 | Normal  | SC      |
| Liu et al[27]   | 2019 | China   | gastric cancer    | lncRNA HOXA11-AS      | Tissues | 94      |                       | Y                 | qRT-PCR | 60                 | Normal  | HR/SC   |
| Huang et al[28] | 2019 | China   | gastric cancer    | lncRNA TRPM2-AS       | Tissues | 124     |                       | Y                 | qRT-PCR | 60                 | Median  | HR/SC   |

**Table 1. Continued.**

| First author    | Year | Country | Pathological type | Expression sit        | Sample  | OS Size | DFS/PFS/DSS /RFS Size | Clinical features | Assay   | Follow-up (Months) | Cut-off | Outcome |
|-----------------|------|---------|-------------------|-----------------------|---------|---------|-----------------------|-------------------|---------|--------------------|---------|---------|
| Chai et al[29]  | 2019 | China   | gastric cancer    | lncRNA ZEB1-AS1       | Tissues | 224     |                       | Y                 | qRT-PCR | 96                 | Normal  | HR/SC   |
| Huang et al[30] | 2019 | China   | gastric cancer    | lncRNA ADPGK-AS1      | Tissues | 60      |                       | NA                | qRT-PCR | 60                 | Normal  | SC      |
| Zhang et al[31] | 2019 | China   | gastric cancer    | lncRNA STCAT16        | Tissues | 59      |                       | Y                 | qRT-PCR | 48                 | Normal  | HR/SC   |
| Zhang et al[32] | 2019 | China   | gastric cancer    | lncRNA LINC00460      | Tissues | 90      |                       | Y                 | qRT-PCR | 60                 | Median  | HR/SC   |
| Wang et al[33]  | 2019 | China   | gastric cancer    | lncRNA MVIH           | Tissues | 152     |                       | Y                 | qRT-PCR | 100                | Normal  | HR/SC   |
| Zhang et al[34] | 2019 | China   | gastric cancer    | lncRNA MNX1-AS1       | Tissues | 96      |                       | Y                 | qRT-PCR | 60                 | Median  | HR/SC   |
| Zhang et al[35] | 2019 | China   | gastric cancer    | lncRNA RNA AOC4P      | Tissues | 63      |                       | Y                 | qRT-PCR | 50                 | Median  | HR/SC   |
| Zhang et al[36] | 2019 | China   | gastric cancer    | lncRTNA RNA LINC02532 | Tissues | 52      |                       | NA                | qRT-PCR | 80                 | Median  | SC      |
| Chen et al[37]  | 2019 | China   | gastric cancer    | lncRNA SNHG17         | Tissues | 153     | 153,PFS               | Y                 | qRT-PCR | 60                 | Normal  | HR/SC   |
| Xu et al[38]    | 2018 | China   | gastric cancer    | LINC00346             | Tissues | 106     | 106,DFS               | NA                | qRT-PCR | 48                 | Median  | SC      |
| Wang et al[39]  | 2019 | China   | gastric cancer    | lncRNA LINC00958      | Tissues | 200     |                       | Y                 | qRT-PCR | 46                 | Normal  | HR/SC   |
| Chen et al[40]  | 2019 | China   | gastric cancer    | LINC01939             | Tissues | 160     | 160,PFS               | Y                 | qRT-PCR | 108                | Normal  | HR/SC   |
| Li et al[41]    | 2019 | China   | gastric cancer    | lncRNA MIR22HG        | Tissues | 43      |                       | NA                | qRT-PCR | 60                 | Normal  | SC      |
| Han et al[42]   | 2018 | China   | gastric cancer    | LINC02465             | Tissues | 98      |                       | NA                | qRT-PCR | 60                 | Normal  | SC      |
| Feng et al[43]  | 2018 | China   | gastric cancer    | lncRNA LINC - PINT    | Tissues | 72      |                       | NA                | qRT-PCR | 60                 | Normal  | SC      |
| Xie et al[44]   | 2018 | China   | gastric cancer    | LINC00707             | Tissues | 60      |                       | NA                | qRT-PCR | 36                 | Median  | SC      |
| Zeng et al[45]  | 2018 | China   | gastric cancer    | lncRNA XLOC_006753    | Tissues | 110     |                       | Y                 | qRT-PCR | 108                | Median  | HR/SC   |
| Miao et al[46]  | 2018 | China   | gastric cancer    | lncRNA NORAD          | Tissues | 101     |                       | NA                | qRT-PCR | 48                 | Median  | SC      |
| Yu et al[47]    | 2018 | China   | gastric cancer    | lncRNA MRPL39         | Tissues | 60      |                       | NA                | qRT-PCR | 60                 | Median  | SC      |
| Li et al[48]    | 2018 | China   | gastric cancer    | lncRNA CASC2          | Tissues | 42      |                       | NA                | qRT-PCR | 60                 | Normal  | SC      |
| Lin et al[49]   | 2018 | China   | gastric cancer    | lncRNA RNA SNHG8      | Tissues | 217     |                       | Y                 | qRT-PCR | 54                 | Median  | HR/SC   |
| Wang et al[50]  | 2018 | China   | gastric cancer    | lncRNA RNA AB007962   | Tissues | 96      |                       | Y                 | qRT-PCR | 54                 | Median  | HR/SC   |
| Wu et al[51]    | 2018 | China   | gastric cancer    | lncRNA MaP3K1-2       | Tissues | 91      |                       | Y                 | qRT-PCR | 48                 | Median  | HR/SC   |
| Zhang et al[52] | 2018 | China   | gastric cancer    | lncRNA TP73-AS1       | Tissues | 76      |                       | Y                 | qRT-PCR | 60                 | Normal  | SC      |
| Cao et al[53]   | 2018 | China   | gastric cancer    | lncRNA ADAMTS9-AS2    | Tissues | 71      |                       | NA                | qRT-PCR | 36                 | Normal  | SC      |
| Zhang et al[54] | 2018 | China   | gastric cancer    | LINC00473             | Tissues | 120     |                       | NA                | qRT-PCR | 72                 | Median  | HR/SC   |
| Chen et al[55]  | 2018 | China   | gastric cancer    | LINC01939             | Tissues | 120     |                       | Y                 | qRT-PCR | 96                 | Median  | HR/SC   |
| Pang et al[56]  | 2018 | China   | gastric cancer    | lncRNA RNA LINC00857  | Tissues | 60      |                       | NA                | qRT-PCR | 60                 | Normal  | SC      |

**Table 1. Continued.**

| First author    | Year | Country | Pathological type | Expression sit      | Sample  | OS Size | DFS/PFS/DSS /RFS Size | Clinical features | Assay   | Follow-up (Months) | Cut-off | Outcome |
|-----------------|------|---------|-------------------|---------------------|---------|---------|-----------------------|-------------------|---------|--------------------|---------|---------|
| Chen et al[57]  | 2018 | China   | gastric cancer    | lncRNA RNA NNT-AS1  | Tissues | 48      |                       | NA                | qRT-PCR | 60                 | Median  | SC      |
| Zhang et al[58] | 2018 | China   | gastric cancer    | lncRNA RNA UFC1     | Tissues | 79      |                       | NA                | qRT-PCR | 30                 | Normal  | SC      |
| Zou et al[59]   | 2018 | China   | gastric cancer    | lncRNA RNA 00324    | Tissues | 66      |                       | NA                | qRT-PCR | 36                 | Median  | HR/SC   |
| Zhao et al[60]  | 2018 | China   | gastric cancer    | lncRNA AFAP1-AS1    | Tissues | 80      |                       | NA                | qRT-PCR | 36                 | Median  | SC      |
| Xu et al[61]    | 2018 | China   | gastric cancer    | lncRNA FOXD2-AS1    | Tissues | 106     |                       | NA                | qRT-PCR | 36                 | Median  | HR/SC   |
| Liu et al[62]   | 2018 | China   | gastric cancer    | lncRNA RNA ZEB1-AS1 | Tissues | 75      |                       | Y                 | qRT-PCR | 36                 | Normal  | HR/SC   |
| Zhang et al[63] | 2018 | China   | gastric cancer    | lncRNA DQ786243     | Tissues | 172     |                       | Y                 | qRT-PCR | 60                 | Median  | HR/SC   |
| Ye et al[64]    | 2018 | China   | gastric cancer    | lncRNA AFAP1-AS1    | Tissues | 66      |                       | Y                 | qRT-PCR | 36                 | Median  | HR/SC   |
| Zhang et al[65] | 2018 | China   | gastric cancer    | lncRNA MT1JP        | Tissues | 80      |                       | NA                | qRT-PCR | 60                 | Median  | SC      |
| Zhang et al[66] | 2018 | China   | gastric cancer    | lncRNA AK096174     | Tissues | 32      |                       | NA                | qRT-PCR | 40                 | Normal  | SC      |
| Li et al[67]    | 2018 | China   | gastric cancer    | lncRNA RNA M26317   | Tissues | 436     |                       | NA                | qRT-PCR | 60                 | Median  | SC      |
| Dong et al[68]  | 2018 | China   | gastric cancer    | lncRNA RNA Lnc01614 | Tissues | 79      |                       | NA                | qRT-PCR | 60                 | Normal  | SC      |
| Xu et al[69]    | 2019 | China   | gastric cancer    | lncRNA HOTAIR       | Tissues | 54      |                       | Y                 | qRT-PCR | 54                 | Normal  | SC      |
| Endo et al[70]  | 2013 | Japan   | gastric cancer    | lncRNA HOTAIR       | Tissues | 36+32   |                       | NA                | qRT-PCR | 60                 | Normal  | SC      |
| Xu et al[71]    | 2013 | China   | gastric cancer    | lncRNA HOTAIR       | Tissues | 83      |                       | NA                | qRT-PCR | 78                 | Normal  | HR/SC   |
| Zhang et al[72] | 2015 | China   | gastric cancer    | lncRNA HOTAIR       | Tissues | 50      |                       | NA                | qRT-PCR | 48                 | Median  | SC      |
| Chen et al[73]  | 2017 | China   | gastric cancer    | lncRNA HOTAIR       | Tissues | 65      |                       | Y                 | qRT-PCR | 64                 | Median  | HR/SC   |
| Feng et al[74]  | 2017 | China   | gastric cancer    | lncRNA HOTAIR       | Tissues | 32      |                       | NA                | qRT-PCR | 84                 | Normal  | SC      |
| Han et al[75]   | 2021 | China   | gastric cancer    | lncRNA H19          | Tissues | 47      |                       | Y                 | qRT-PCR | 36                 | Median  | HR/SC   |
|                 |      |         |                   | lncRNA SIRT6        |         |         |                       |                   |         |                    |         | SC      |
| Tian et al[76]  | 2020 | China   | gastric cancer    | lncRNA AK093987     | Tissues | 78      |                       | Y                 | qRT-PCR | 37                 | Median  | HR/SC   |
| Peng et al[77]  | 2020 | China   | gastric cancer    | lncRNA CECR7        | Tissues | 78      |                       | Y                 | qRT-PCR | 36                 | Median  | HR/SC   |
| Wang et al[78]  | 2020 | China   | gastric cancer    | lncRNA H19          | Serum   | 87      |                       | Y                 | qRT-PCR | 35                 | Median  | HR/SC   |
|                 |      |         |                   | lncRNA MEG3         |         |         |                       |                   |         |                    |         | SC      |
| Zhou et al[79]  | 2020 | China   | gastric cancer    | lncRNA SGOL1-AS1    | Tissues | 45      |                       | NA                | qRT-PCR | 48                 | Median  | HR/SC   |

**Table 1. Continued.**

| First author    | Year | Country | Pathological type | Expression sit       | Sample  | OS Size | DFS/PFS/DSS /RFS Size | Clinical features | Assay   | Follow-up (Months) | Cut-off | Outcome |
|-----------------|------|---------|-------------------|----------------------|---------|---------|-----------------------|-------------------|---------|--------------------|---------|---------|
| Zhang et al[80] | 2020 | China   | gastric cancer    | lncRNA RNA RAB1A-2   | Tissues | 68      |                       | NA                | qRT-PCR | 84                 | Median  | SC      |
| Zhong et al[81] | 2020 | China   | gastric cancer    | lncRNA ZDHHC8P1      | Tissues | 83      |                       | Y                 | qRT-PCR | 81                 | Median  | HR/SC   |
|                 |      |         |                   | lncRNA MEG3          |         |         |                       |                   |         |                    |         | SC      |
|                 |      |         |                   | lncRNA TUG1          |         |         |                       |                   |         |                    |         | SC      |
| Wu et al[82]    | 2020 | China   | gastric cancer    | lncRNA MIAT          | Serum   | 120     |                       | NA                | qRT-PCR | 50                 |         | SC      |
| Zhang et al[83] | 2020 | China   | gastric cancer    | lncRNA NET1          | Tissues | 84      |                       | NA                | qRT-PCR | 84                 | Median  | HR/SC   |
| Zhang et al[84] | 2020 | China   | gastric cancer    | lncRNA SATB2-AS1     | Tissues | 78      |                       | NA                | qRT-PCR | 156                | Median  | HR/SC   |
| Luo et al[85]   | 2020 | China   | gastric cancer    | lncRNA RP11-169F17.1 | Tissues | 54      |                       | Y                 | qRT-PCR | 100                | Normal  | HR/SC   |
| Li et al[86]    | 2020 | China   | gastric cancer    | lncRNA LOXL1-AS1     | Tissues | 89      |                       | NA                | qRT-PCR | 156                | Normal  | HR/SC   |
| Zhao et al[87]  | 2019 | China   | gastric cancer    | lncRNA HOTAIR        | Tissues | 246     |                       | Y                 | qRT-PCR | 60                 | Normal  | HR/SC   |
| Zhang et al[88] | 2018 | China   | gastric cancer    | lncRNA AOC4P         | Tissues | 63      |                       | NA                | qRT-PCR | 50                 | Median  | HR/SC   |
| Feng et al[89]  | 2018 | China   | gastric cancer    | lncRNA AFAP1-AS1     | Tissues | 91      |                       | Y                 | qRT-PCR | 66                 | Median  | HR/SC   |
| Hu et al[90]    | 2014 | China   | Gastric cancer    | lncRNA RNA GAPLINC   | Tissue  |         | 90,DFS                | NA                | qRT-PCR | 76                 | Median  | SC      |
| Xu et al[91]    | 2014 | China   | Gastric cancer    | lncRNA FENDRR        | Tissue  | 158     | 158,PFD               | Y                 | qRT-PCR | 48                 | Median  | HR/SC   |
| Guo et al[92]   | 2018 | China   | GCA               | lncRNA C5orf66-AS1   | Tissue  | 125     |                       | Y(OR)             | qRT-PCR | 66                 | Normal  | SC      |
| Dong et al[93]  | 2018 | China   | Gastric cancer    | lncRNA lnc01614      | Tissue  | 79      |                       | NA                | qRT-PCR | 60                 | Normal  | SC      |
| Ma et al[94]    | 2018 | China   | Gastric cancer    | lncRNA SFTA1P        | Tissue  | 68      |                       | NA                | qRT-PCR | 36                 | Median  | SC      |
| Zhao et al[95]  | 2018 | China   | Gastric cancer    | lncRNA HOTTIP        | Serum   | 126     |                       | Y                 | qRT-PCR | 66                 | Normal  | HR/SC   |
| Quan et al[96]  | 2018 | China   | Gastric cancer    | lncRNA MLK7-AS1      | Tissue  | 123     | 123,PFS               | Y                 | qRT-PCR | 72                 | Normal  | HR/SC   |
| Chen et al[97]  | 2018 | China   | Gastric cancer    | lncRNA HAGLROS       | Tissue  | 84      | 84,DFS                | NA                | qRT-PCR | 40                 | Median  | HR/SC   |
| Zhang et al[98] | 2018 | China   | Gastric cancer    | lncRNA SNHG12        | Tissue  | 60      | 60,DFS                | NA                | qRT-PCR | 60                 | Median  | SC      |
| Zeng et al[99]  | 2018 | China   | Gastric cancer    | lncRNA LINC00675     | Tissue  | 45;80   |                       | NA                | qRT-PCR | 84                 | Median  | SC      |
| Qin et al[100]  | 2018 | China   | Gastric cancer    | lncRNA 01296         | Tissue  | 60      |                       | NA                | qRT-PCR | 60                 | Normal  | SC      |
| Wu et al[101]   | 2017 | China   | Gastric cancer    | lncRNA FEZF1-AS1     | Tissue  | 104     | 104,DFS               | NA                | qRT-PCR | 80                 | Median  | SC      |
| Ba et al[102]   | 2017 | China   | Gastric cancer    | lncRNA LINC00673     | Tissue  | 79      | 79,DFS                | Y                 | qRT-PCR | 66                 | Median  | HR/SC   |
| Hu et al[103]   | 2017 | China   | Gastric cancer    | lncRNA SNHG1         | Tissue  | 50      |                       | NA                | qRT-PCR | 60                 | Median  | HR/SC   |
| Yan et al[104]  | 2017 | China   | Gastric cancer    | lncRNA SNHG6         | Tissue  | 78      |                       | NA                | qRT-PCR | 60                 | Median  | SC      |

**Table 1. Continued.**

| First author     | Year | Country | Pathological type | Expression sit       | Sample | OS Size | DFS/PFS/DSS /RFS Size | Clinical features | Assay   | Follow-up (Months) | Cut-off | Outcome |
|------------------|------|---------|-------------------|----------------------|--------|---------|-----------------------|-------------------|---------|--------------------|---------|---------|
| Hao et al[105]   | 2017 | China   | Gastric cancer    | lncRNA DANCR         | Tissue | 118     |                       | NA                | qRT-PCR | 98                 | Normal  | SC      |
| Wu et al[106]    | 2017 | China   | Gastric cancer    | lncRNA RNA CCAT2     | Tissue | 208     |                       | Y                 | qRT-PCR |                    | Normal  | HR/SC   |
| Liu et al[107]   | 2017 | China   | Gastric cancer    | lncRNA CARLo-5       | Tissue | 240     | 240,RFS               | Y(RR)             | qRT-PCR | 60                 | Normal  | HR/SC   |
| Huang et al[108] | 2017 | China   | Gastric cancer    | lncRNA LINC00673     | Tissue | 73      | 73,DFS                | NA                | qRT-PCR | 42                 | Normal  | SC      |
| Qi et al[109]    | 2017 | China   | Gastric cancer    | lncRNA AGAP2-AS1     | Tissue | 50      | 50,PFS                | NA                | qRT-PCR | 50                 | Median  | SC      |
| Liu et al[110]   | 2017 | China   | Gastric cancer    | lncRNA FEZF1-AS1     | Tissue |         | 82,DFS                | NA                | qRT-PCR | 42                 | Normal  | SC      |
| Zuo et al[111]   | 2017 | China   | Gastric cancer    | lncRNA UCA1          | Tissue | 37      |                       | Y                 | qRT-PCR | 36                 | Median  | HR/SC   |
| Yu et al[112]    | 2017 | China   | Gastric cancer    | lncRNA linc00261     | Tissue |         | 80,DFS                | NA                | qRT-PCR |                    | Median  | SC      |
| Xu et al[113]    | 2017 | China   | Gastric cancer    | lncRNA PVT1          | Tissue |         | 190,DFS,DSS           | NA                | qRT-PCR | 84                 | median  | HR/SC   |
| Zeng et al[114]  | 2017 | China   | Gastric cancer    | lncRNA RP11-513G11.1 | Tissue | 92      | 92,PFS                | Y                 | qRT-PCR | 60                 | Mean    | HR/SC   |
| Wang et al[115]  | 2017 | China   | Gastric cancer    | lncRNA HOTAIR        | Tissue | 45      |                       | Y                 | qRT-PCR | 150                | Normal  | SC      |
| Feng et al[116]  | 2017 | China   | Gastric cancer    | lncRNA RAB11B-AS1    | Tissue | 83      | 83,PFS                | NA                | qRT-PCR | 54                 | Normal  | HR/SC   |
| Zou et al[117]   | 2016 | China   | Gastric cancer    | lncRNA Sox2ot        | Tissue | 155     | 155,DFS               | Y                 | qRT-PCR | 66                 | median  | HR/SC   |
| Zhao et al[118]  | 2016 | China   | Gastric cancer    | lncRNA SNHG5         | Tissue |         | 84,DFS                | NA                | qRT-PCR | 48                 | median  | SC      |
| Sun et al[119]   | 2016 | China   | Gastric cancer    | lncRNA HOXA11-AS     | Tissue | 85      | 85,PFS                | NA                | qRT-PCR | 36                 | median  | SC      |
| Chen et al[120]  | 2016 | China   | Gastric cancer    | lncRNA XIST          | Tissue | 106     |                       | NA                | qRT-PCR | 102                | median  | SC      |
| Jin et al[121]   | 2016 | China   | Gastric cancer    | lncRNA HULC          | Serum  | 54      |                       | NA                | qRT-PCR | 32                 | Normal  | SC      |
| Nie et al[122]   | 2016 | China   | Gastric cancer    | lncRNA ZFAS1         | Tissue | 54      | 54,PFS                | NA                | qRT-PCR | 36                 | Median  | SC      |
| Sun et al[123]   | 2016 | China   | Gastric cancer    | lncRNA BC04195       | Tissue | 165     |                       | NA                | qRT-PCR | 72                 | Median  | HR/SC   |
| Ye et al[124]    | 2016 | China   | Gastric cancer    | lncRNA GCInc1        | Tissue | 105     |                       | NA                | qRT-PCR | 72                 | Median  | HR/SC   |
|                  |      |         |                   | lncRNA HOTTIP        | Tissue | 98      |                       | Y(RR)             | qRT-PCR | 60                 | Median  | HR/SC   |
| Fu et al[125]    | 2016 | China   | Gastric cancer    | lncRNA NEAT1         | Tissue | 140     |                       | Y                 | qRT-PCR | 96                 | Median  | HR/SC   |
| Shang et al[126] | 2016 | China   | Gastric cancer    | lncRNA UCA1          | Tissue |         | 77,DFS                | Y                 | qRT-PCR | 72                 | Normal  | HR/SC   |
| Yuan et al[127]  | 2016 | China   | Gastric cancer    | lncRNA RNA PVT1      | Tissue | 111     | 111,DFS               | Y                 | qRT-PCR | 48                 | Median  | HR/SC   |
| Zhang et al[128] | 2016 | China   | Gastric cancer    | lncRNA TUG1          | Tissue | 100     |                       | Y                 | qRT-PCR | 60                 | Median  | HR/SC   |
| Zhang et al[129] | 2016 | China   | Gastric cancer    | lncRNA LINC00668     | Tissue | 106     |                       | Y                 | qRT-PCR | 60                 | Median  | HR/SC   |
| Ma et al[130]    | 2016 | China   | Gastric cancer    | lncRNA DUXAP8        | Tissue | 72      | 72,PFS                | NA                | qRT-PCR | 36                 | Median  | SC      |

**Table 1. Continued.**

| First author     | Year | Country | Pathological type | Expression sit          | Sample | OS Size | DFS/PFS/DSS /RFS Size | Clinical features | Assay   | Follow-up (Months) | Cut-off | Outcome |
|------------------|------|---------|-------------------|-------------------------|--------|---------|-----------------------|-------------------|---------|--------------------|---------|---------|
| Ma et al[131]    | 2016 | China   | Gastric cancer    | lncRNA PANDAR           | Tissue | 100     | 100,DFS               | Y                 | qRT-PCR | 36                 | Median  | HR/SC   |
| Ma et al[132]    | 2016 | China   | IGC               | lincRNA KrT18P55        | Tissue | 97      | 97,DSS                | NA                | qRT-PCR | 54                 | Median  | SC      |
| Song et al[133]  | 2016 | China   | Gastric cancer    | 12 lncRNAs <sup>a</sup> | Tissue | 120     |                       | Y                 | qRT-PCR | 84                 | Normal  | HR/SC   |
| Chen et al[134]  | 2016 | China   | Gastric cancer    | lincRNA 00152           | Tissue | 97      |                       | Y                 | qRT-PCR | 60                 | Median  | HR/SC   |
| Nie et al[135]   | 2016 | China   | Gastric cancer    | lncRNA RNA MIR31HG      | Tissue | 42      | 42,PFS                | NA                | qRT-PCR | 36                 | Median  | SC      |
| Chen et al[136]  | 2016 | China   | Gastric cancer    | lncRNA RNA SNHG15       | Tissue | 106     | 106,DFS               | Y                 | qRT-PCR | 36                 | Median  | HR/SC   |
| Meng et al[137]  | 2016 | China   | Gastric cancer    | lncRNA MEG3             | Tissue | 55      |                       | NA                | qRT-PCR | 36                 | Normal  | SC      |
| Lv et al[138]    | 2016 | China   | Gastric cancer    | lncRNA RNA BC032469     | Tissue | 68      |                       | NA                | qRT-PCR | 24                 | Normal  | SC      |
| Fei et al[139]   | 2016 | China   | Gastric cancer    | lncRNA LINC00982        | Tissue | 106     | 106,DFS               | Y                 | qRT-PCR | 48                 | Median  | HR/SC   |
| Sun et al[140]   | 2016 | China   | Gastric cancer    | lncRNA ACI38128.1       | Tissue | 94      | 94,DFS                | NA                | qRT-PCR | 82                 | Median  | SC      |
| Chen et al[141]  | 2015 | China   | Gastric cancer    | lncRNA RP11-119F7.4     | Tissue | 96      | 96,DFS                |                   | qRT-PCR | 82                 | Median  | SC      |
|                  |      |         |                   | lncRNA MALAT2           | Tissue | 73      | 73,DFS                | NA                | qRT-PCR | 72                 | Normal  | SC      |
| Chen et al[142]  | 2015 | China   | Gastric cancer    | lncRNA HIF1A-AS2        | Tissue | 83      |                       | Y                 | qRT-PCR | 60                 | Median  | HR/SC   |
| Hu et al[143]    | 2015 | China   | Gastric cancer    | lncRNA linc-UBC1        | Tissue | 85      |                       | NA                | qRT-PCR | 84                 | Median  | SC      |
| Xie et al[144]   | 2015 | China   | Gastric cancer    | lncRNA HOXA-AS2         | Tissue | 55      | 55,DFS                | NA                | qRT-PCR | 48                 | Median  | SC      |
| Lai et al[145]   | 2015 | China   | Gastric cancer    | lncRNA FER1L4           | Tissue | 89      |                       | Y                 | qRT-PCR | 60                 | Normal  | HR/SC   |
| Li et al[146]    | 2015 | China   | Gastric cancer    | lncRNA BANCR            | Tissue | 184     |                       | Y                 | qRT-PCR | 93                 | Median  | HR/SC   |
| Liu et al[147]   | 2015 | China   | DGC               | linc HOTAIR             | Tissue |         | 61,DFS                | NA                | qRT-PCR |                    | Normal  | SC      |
| Kong et al[148]  | 2015 | China   | Gastric cancer    | lncRNA PVT1             | Tissue | 80      | 80,DFS                | Y                 | qRT-PCR | 36                 | Median  | HR/SC   |
| Qi et al[149]    | 2015 | China   | Gastric cancer    | lncRNA TUSC7            | Tissue |         | 78,DFS,DSS            | NA                | qRT-PCR | 72                 | Normal  | SC      |
| Peng et al[150]  | 2015 | China   | Gastric cancer    | lncRNA SPRY4-IT1        | Tissue | 175     | 175,DFS               | Y                 | qRT-PCR | 60                 | Median  | HR/SC   |
| Saito et al[151] | 2015 | Japan   | Gastric cancer    | lncRNA ATB              | Tissue | 105     |                       | Y                 | qRT-PCR | 120                | Median  | HR/SC   |
| Sun et al[152]   | 2015 | China   | Gastric cancer    | 5 lncRNAs <sup>b</sup>  | Tissue | 165     |                       | NA                | qRT-PCR | 70                 | Normal  | HR/SC   |
| Wang et al[153]  | 2015 | China   | Gastric cancer    | lncRNA GAS1             | Tissue | 105     |                       | NA                | qRT-PCR | 70                 | Normal  | HR/SC   |
| Zhao et al[154]  | 2015 | China   | GAC               | lncRNA HOTAIR           | Tissue | 168     |                       | Y                 | qRT-PCR | 66                 | Median  | HR/SC   |
| Zheng et al[155] | 2015 | China   | Gastric cancer    | lncRNA UCA1             | Tissue | 112     | 112,DFS               | Y                 | qRT-PCR | 60                 | Median  | HR/SC   |
| Wang et al[156]  | 2015 | China   | Gastric cancer    | lncRNA GC240            | Tissue | 58      |                       | Y                 | qRT-PCR | 60                 | Normal  | HR/SC   |
| Wang et al[157]  | 2014 | China   | Gastric cancer    | lncRNA MRUL             | Tissue |         | 40,DFS                | NA                | qRT-PCR | 18                 | Median  | SC      |

**Table 1. Continued.**

| First author       | Year | Country | Pathological type | Expression sit                 | Sample | OS Size  | DFS/PFS/DSS /RFS Size | Clinical features | Assay              | Follow-up (Months) | Cut-off          | Outcome  |
|--------------------|------|---------|-------------------|--------------------------------|--------|----------|-----------------------|-------------------|--------------------|--------------------|------------------|----------|
| Sun et al[158]     | 2014 | China   | Gastric cancer    | lncRNA GAS5                    | Tissue | 89       | 89,DFS                | Y                 | qRT-PCR            | 36                 | Median           | HR/SC    |
| Li et al[159]      | 2014 | China   | Gastric cancer    | lncRNA H19                     | Tissue | 74       |                       | NA                | qRT-PCR            | 53                 | Normal           | SC       |
| Zhang et al[160]   | 2014 | China   | Gastric cancer    | lncRNA ANRIL                   | Tissue | 120      | 120,DFS               | Y                 | qRT-PCR            | 56                 | Normal           | HR/SC    |
| Liu et al[161]     | 2014 | China   | Gastric cancer    | lncRNA HOTAIR                  | Tissue | 78       |                       | NA                | qRT-PCR            | 48                 | Median           | SC       |
| Zhang et al[162]   | 2014 | China   | Gastric cancer    | lncRNA H19                     | Tissue | 80       |                       | Y                 | qRT-PCR            | 60                 | Normal           | HR/SC    |
| Zhou et al[163]    | 2014 | China   | Gastric cancer    | lncRNA LET                     | Tissue | 93       |                       | N(RR)             | qRT-PCR            | 60                 | Normal           | HR/SC    |
| Xu et al[164]      | 2014 | China   | Gastric cancer    | lncRNA LSINCT5                 | Tissue |          | 71,DFS,DSS            | Y                 | qRT-PCR            | 66                 | Median           | HR/SC    |
| Okugawa et al[165] | 2014 | America | Gastric cancer    | lncRNA MALAT1<br>lncRNA HOTAIR | Tissue | 150      |                       | Y                 | qRT-PCR            | 60                 | Normal           | HR/SC    |
| Zhang et al[166]   | 2014 | China   | Gastric cancer    | lncRNA LINC00628               | Tissue | 82       |                       | Y                 | qRT-PCR            | 72                 | Median           | HR/SC    |
| Yang et al[167]    | 2013 | China   | Gastric cancer    | lncRNA GHET1<br>lncRNA MEG3    | Tissue | 42<br>72 |                       | NA<br>NA          | qRT-PCR<br>qRT-PCR | 40<br>48           | Median<br>Median | SC<br>SC |
| Sun et al[168]     | 2013 | China   | Gastric cancer    |                                |        |          |                       |                   |                    |                    |                  |          |
| Park et al[169]    | 2013 | Korea   | Gastric cancer    | lincRNA BM742401               | Tissue | 113      |                       | Y                 | qRT-PCR            | 80                 | Median           | HR/SC    |

<sup>a</sup>, lncRNA XLOC\_010235, lncRNA CACNA1C-AS3, lncRNA INTS7, lncRNA AC104699.1, lncRNA TSNAX-DISC1, lncRNA PRSS21, lncRNA RP11789C1.1, lncRNA RP11-528G1.2, lncRNA MYLK-AS1, lncRNA RP11-643M14.1, lncRNA GS1-5L10.1, lncRNA AP001439.2.

<sup>b</sup>,lncRNA GAS1, lncRNA BC041951, lncRNA AK094163, lncRNA NST00000430239, lncRNA NR\_024373.

OS,overall survival;SC, survival curve; DFS,disease-free survival; PFS,progression-free survival;DSS, Disease Specific Survival; RFS, recurrence-free survival;NA, data unavailable;Y,data available;qRT-PCR, quantitative real-time PCR;GCA,Gastric cardia adenocarcinoma;DGC,Diffuse-type gastric cancerdtc (intestinal-type gastric cancer and Intestinal-type gastric cancer);GAC,Gastric adenocarcinoma.

## References

1. Zhu H, Tang JH, Zhang SM, Qian JP, Ling X, Wu XY *et al.* Long Noncoding RNA LINC00963 Promotes CDC5L-Mediated Malignant Progression in Gastric Cancer. *OncoTargets and therapy*2020;13:12999-3013.
2. Yue K, Ma JL, Jiang T, Yue J, Sun SK, Shen JL *et al.* LncRNA RPPH1 predicts poor prognosis and regulates cell proliferation and migration by repressing P21 expression in gastric cancer. *European review for medical and pharmacological sciences*2020 Nov;24(21):11072-80.
3. Fan H, Ge Y, Ma X, Li Z, Shi L, Lin L *et al.* Long non-coding RNA CCDC144NL-AS1 sponges miR-143-3p and regulates MAP3K7 by acting as a competing endogenous RNA in gastric cancer. *Cell death & disease*2020 Jul 9;11(7):521.
4. Zhong X, Yu X, Wen X, Chen L, Gu N. Activation of the LINC00242/miR-141/FOXC1 axis underpins the development of gastric cancer. *Cancer cell international*2020;20:272.
5. Wang HF, Lv JQ, Li HH, Wang W, Lin FQ. High long non-coding LIFR-AS1 expression correlates with poor survival in gastric carcinoma. *European review for medical and pharmacological sciences*2020 May;24(10):5378-84.
6. Wang X, Chen X, Tian Y, Jiang D, Song Y. Long Noncoding RNA RGMB-AS1 Acts as a microRNA-574 Sponge Thereby Enhancing the Aggressiveness of Gastric Cancer via HDAC4 Upregulation. *OncoTargets and therapy*2020;13:1691-704.
7. Tang J, Huang F, Wang H, Cheng F, Pi Y, Zhao J *et al.* Knockdown of TPT1-AS1 inhibits cell proliferation, cell cycle G1/S transition, and epithelial-mesenchymal transition in gastric cancer. *Bosnian journal of basic medical sciences*2021 Feb 1;21(1):39-46.
8. Ai W, Li F, Yu HH, Liang ZH, Zhao HP. Up-regulation of long noncoding RNA LINC00858 is associated with poor prognosis in gastric cancer. *The journal of gene medicine*2020 Jul;22(7):e3179.
9. Chen Q, Huang X, Dong X, Wu J, Teng F, Xu H. Long non-coding RNA ERICH3-AS1 is an unfavorable prognostic factor for gastric cancer. *PeerJ*2020;8:e8050.
10. Shuai Y, Ma Z, Liu W, Yu T, Yan C, Jiang H *et al.* TEAD4 modulated LncRNA MNX1-AS1 contributes to gastric cancer progression partly through suppressing BTG2 and activating BCL2. *Molecular cancer*2020 Jan 10;19(1):6.
11. Zhang R, Liu Y, Liu H, Chen W, Fan HN, Zhang J *et al.* The long non-coding RNA SNHG12 promotes gastric cancer by activating the phosphatidylinositol 3-kinase/AKT pathway. *Aging*2019 Dec 5;11(23):10902-22.
12. Yan J, Huang X, Zhang X, Chen Z, Ye C, Xiang W *et al.* LncRNA LINC00470 promotes the degradation of PTEN mRNA to facilitate malignant behavior in gastric cancer cells. *Biochem Biophys Res Commun*2020 Jan 22;521(4):887-93.
13. Zhang G, Chi N, Lu Q, Zhu D, Zhuang Y. LncRNA PTCSC3 Is a Biomarker for the Treatment and Prognosis of Gastric Cancer. *Cancer biotherapy & radiopharmaceuticals*2020 Feb;35(1):77-81.
14. Qu CX, Shi XC, Bi H, Zhai LQ, Yang Q. LncRNA AOC4P affects biological behavior of gastric cancer cells through MAPK signaling pathway. *European review for medical and pharmacological sciences*2019 Oct;23(20):8852-60.
15. He X, Wang J, Chen J, Han L, Lu X, Miao D *et al.* LncRNA UCA1 Predicts a Poor Prognosis and Regulates Cell Proliferation and Migration by Repressing p21 and SPRY1 Expression in GC. *Molecular therapy Nucleic acids*2019 Dec 6;18:605-16.
16. Zhai H, Li Y. BCYRN1 is correlated with progression and prognosis in gastric cancer. *Bioscience reports*2019 Nov 29;39(11).
17. Fu J, Zhao W, Guo D, Li Z. LncRNA E2F-Mediated Cell Proliferation Enhancing LncRNA Regulates Cancer Cell Behaviors and Affects Prognosis of Gastric Cancer. *Dig Dis Sci*2020



May;65(5):1348-54.

18. Xuan Y, Wang Y. Long non-coding RNA SNHG3 promotes progression of gastric cancer by regulating neighboring MED18 gene methylation. *Cell death & disease* 2019 Sep 18;10(10):694.
19. Xu Y, Zhang G, Zou C, Qi W, Gong Z, Zhang G *et al.* Long non-coding RNA LINC01225 promotes proliferation, invasion and migration of gastric cancer via Wnt/beta-catenin signalling pathway. *Journal of cellular and molecular medicine* 2019 Nov;23(11):7581-91.
20. Wang WJ, Guo CA, Li R, Xu ZP, Yu JP, Ye Y *et al.* Long non-coding RNA CASC19 is associated with the progression and prognosis of advanced gastric cancer. *Aging* 2019 Aug 15;11(15):5829-47.
21. Zheng J, Zhang H, Ma R, Liu H, Gao P. Long non-coding RNA KRT19P3 suppresses proliferation and metastasis through COPS7A-mediated NF-kappaB pathway in gastric cancer. *Oncogene* 2019 Nov;38(45):7073-88.
22. Shi XY, Sun YZ, Li M, Li HY. LncRNA CADM1-AS1 serves as a new prognostic biomarker for gastric cancer. *European review for medical and pharmacological sciences* 2019 Aug;23(3 Suppl):232-38.
23. Nie ML, Han J, Huang HC, Guo T, Huangfu LT, Cheng XJ *et al.* The novel lncRNA p4516 acts as a prognostic biomarker promoting gastric cancer cell proliferation and metastasis. *Cancer management and research* 2019;11:5375-91.
24. Guo Y, Yue P, Wang Y, Chen G, Li Y. PCAT-1 contributes to cisplatin resistance in gastric cancer through miR-128/ZEB1 axis. *Biomedicine & pharmacotherapy = Biomedecine & pharmacotherapie* 2019 Oct;118:109255.
25. Li Y, Jiang L, Lv S, Xu H, Fan Z, He Y *et al.* E2F6-mediated lncRNA CASC2 down-regulation predicts poor prognosis and promotes progression in gastric carcinoma. *Life Sci* 2019 Sep 1;232:116649.
26. Zhao G, Wang S, Liang X, Wang C, Peng B. Oncogenic role of long non-coding RNA SNHG12 in gastric cancer cells by targeting miR-16. *Experimental and therapeutic medicine* 2019 Jul;18(1):199-208.
27. Liu Y, Zhang YM, Ma FB, Pan SR, Liu BZ. Long noncoding RNA HOXA11-AS promotes gastric cancer cell proliferation and invasion via SRSF1 and functions as a biomarker in gastric cancer. *World journal of gastroenterology : WJG* 2019 Jun 14;25(22):2763-75.
28. Huang B, Chang C, Wang BL, Li H. ELK1-induced upregulation of lncRNA TRPM2-AS promotes tumor progression in gastric cancer by regulating miR-195/ HMGA1 axis. *Journal of cellular biochemistry* 2019 Oct;120(10):16921-33.
29. Chai H, Sun C, Liu J, Sheng H, Zhao R, Feng Z. The Relationship Between ZEB1-AS1 Expression and the Prognosis of Patients With Advanced Gastric Cancer Receiving Chemotherapy. *Technology in cancer research & treatment* 2019 Jan 1;18:1533033819849069.
30. Huang Z, Yang H. Upregulation of the long noncoding RNA ADPGK-AS1 promotes carcinogenesis and predicts poor prognosis in gastric cancer. *Biochem Biophys Res Commun* 2019 May 21;513(1):127-34.
31. Zhang JF, Jiang W, Zhang QF, Kuai XL, Mao ZB, Wang ZW. Long noncoding RNA STCAT16 suppresses cell growth and its expression predicts prognosis in patients with gastric cancer. *Molecular medicine reports* 2019 Jun;19(6):4613-22.
32. Zhang S, Xu J, Wang H, Guo H. Downregulation of long noncoding RNA LINC00460 expression suppresses tumor growth in vitro and in vivo in gastric cancer. *Cancer biomarkers : section A of Disease markers* 2019;24(4):429-37.
33. Wang A, Du L, Jiang K, Kong Q, Zhang X, Li L. Long noncoding RNA microvascular invasion in hepatocellular carcinoma is an indicator of poor prognosis and a potential therapeutic target in gastric cancer. *Journal of cancer research and therapeutics* 2019 Jan-Mar;15(1):126-31.

34. Zhang W, Huang L, Lu X, Wang K, Ning X, Liu Z. Upregulated expression of MNX1-AS1 long noncoding RNA predicts poor prognosis in gastric cancer. *Bosnian journal of basic medical sciences*2019 May 20;19(2):164-71.
35. Zhang K, Lu C, Huang X, Cui J, Li J, Gao Y *et al.* Long noncoding RNA AOC4P regulates tumor cell proliferation and invasion by epithelial-mesenchymal transition in gastric cancer. *Therapeutic advances in gastroenterology*2019;12:1756284819827697.
36. Zhang C, Ma MH, Liang Y, Wu KZ, Dai DQ. Novel long non-coding RNA LINC02532 promotes gastric cancer cell proliferation, migration, and invasion in vitro. *World journal of gastrointestinal oncology*2019 Feb 15;11(2):91-101.
37. Chen LL, He J, Qiu XT, Yu J, Wang ZM. The prognostic roles of long non-coding RNA SNHG17 in the patients with gastric cancer. *European review for medical and pharmacological sciences*2019 Feb;23(3):1063-68.
38. Xu TP, Ma P, Wang WY, Shuai Y, Wang YF, Yu T *et al.* KLF5 and MYC modulated LINC00346 contributes to gastric cancer progression through acting as a competing endogenous RNA and indicates poor outcome. *Cell death and differentiation*2019 Nov;26(11):2179-93.
39. Wang W, Song ZJ, Wang Y, Zhong WF, Kang P, Yang Y. Elevated long non-coding RNA LINC00958 was associated with metastasis and unfavorable prognosis in gastric cancer. *European review for medical and pharmacological sciences*2019 Jan;23(2):598-603.
40. Chen M, Fan L, Zhang SM, Li Y, Chen P, Peng X *et al.* LINC01939 inhibits the metastasis of gastric cancer by acting as a molecular sponge of miR-17-5p to regulate EGR2 expression. *Cell death & disease*2019 Jan 25;10(2):70.
41. Li H, Wang Y. Long Noncoding RNA (lncRNA) MIR22HG Suppresses Gastric Cancer Progression through Attenuating NOTCH2 Signaling. *Medical science monitor : international medical journal of experimental and clinical research*2019 Jan 23;25:656-65.
42. Han L, Hao Y, Wang J, Wang Z, Yang H, Wu X. Knockdown of LINC02465 Suppresses Gastric Cancer Cell Growth and Metastasis Via PI3K/AKT Pathway. *Human gene therapy Clinical development*2019 Mar;30(1):19-28.
43. Feng H, Zhang J, Shi Y, Wang L, Zhang C, Wu L. Long noncoding RNA LINC-PINT is inhibited in gastric cancer and predicts poor survival. *Journal of cellular biochemistry*2019 Jun;120(6):9594-600.
44. Xie M, Ma T, Xue J, Ma H, Sun M, Zhang Z *et al.* The long intergenic non-protein coding RNA 707 promotes proliferation and metastasis of gastric cancer by interacting with mRNA stabilizing protein HuR. *Cancer letters*2019 Feb 28;443:67-79.
45. Zeng L, Liao Q, Zou Z, Wen Y, Wang J, Liu C *et al.* Long Non-Coding RNA XLOC\_006753 Promotes the Development of Multidrug Resistance in Gastric Cancer Cells Through the PI3K/AKT/mTOR Signaling Pathway. *Cellular physiology and biochemistry : international journal of experimental cellular physiology, biochemistry, and pharmacology*2018;51(3):1221-36.
46. Miao Z, Guo X, Tian L. The long noncoding RNA NORAD promotes the growth of gastric cancer cells by sponging miR-608. *Gene*2019 Mar 1;687:116-24.
47. Yu MJ, Zhao N, Shen H, Wang H. Long Noncoding RNA MRPL39 Inhibits Gastric Cancer Proliferation and Progression by Directly Targeting miR-130. *Genetic testing and molecular biomarkers*2018 Nov;22(11):656-63.
48. Li Y, Lv S, Ning H, Li K, Zhou X, Xv H *et al.* Down-regulation of CASC2 contributes to cisplatin resistance in gastric cancer by sponging miR-19a. *Biomedicine & pharmacotherapy = Biomedecine & pharmacotherapie*2018 Dec;108:1775-82.
49. Lin Y, Hu D, Zhou Q, Lin X, Lin J, Peng F. The fasting blood glucose and long non-coding RNA SNHG8 predict poor prognosis in patients with gastric carcinoma after radical gastrectomy. *Aging*2018 Oct 6;10(10):2646-56.
50. Wang JJ, Yang YC, Song YX, Gao P, Sun JX, Chen XW *et al.* Long non-coding RNA AB007962 is downregulated in gastric cancer and associated with poor prognosis. *Oncology letters*2018

Oct;16(4):4621-27.

51. Wu L, Yin JH, Guan YY, Liu HL, Shen HL, Wang XJ *et al.* A long noncoding RNA MAP3K1-2 promotes proliferation and invasion in gastric cancer. *OncoTargets and therapy*2018;11:4631-39.
52. Zhang W, Zhai Y, Wang W, Cao M, Ma C. Enhanced expression of lncRNA TP73-AS1 predicts unfavorable prognosis for gastric cancer and promotes cell migration and invasion by induction of EMT. *Gene*2018 Dec 15;678:377-83.
53. Cao B, Liu C, Yang G. Down-regulation of lncRNA ADAMTS9-AS2 contributes to gastric cancer development via activation of PI3K/Akt pathway. *Biomedicine & pharmacotherapy = Biomedecine & pharmacotherapie*2018 Nov;107:185-93.
54. Zhang W, Song Y. LINC00473 predicts poor prognosis and regulates cell migration and invasion in gastric cancer. *Biomedicine & pharmacotherapy = Biomedecine & pharmacotherapie*2018 Nov;107:1-6.
55. Chen CL, Ke Q, Luo M, Gao ZY, Li ZJ, Luo ZG *et al.* Loss of LINC01939 expression predicts progression and poor survival in gastric cancer. *Pathology, research and practice*2018 Oct;214(10):1539-43.
56. Pang K, Ran MJ, Zou FW, Yang TW, He F. Long non-coding RNA LINC00857 promotes gastric cancer cell proliferation and predicts poor patient survival. *Oncology letters*2018 Aug;16(2):2119-24.
57. Chen B, Zhao Q, Guan L, Lv H, Bie L, Huang J *et al.* Long non-coding RNA NNT-AS1 sponges miR-424/E2F1 to promote the tumorigenesis and cell cycle progression of gastric cancer. *Journal of cellular and molecular medicine*2018 Oct;22(10):4751-59.
58. Zhang X, Liang W, Liu J, Zang X, Gu J, Pan L *et al.* Long non-coding RNA UFC1 promotes gastric cancer progression by regulating miR-498/Lin28b. *Journal of experimental & clinical cancer research : CR*2018 Jul 3;37(1):134.
59. Zou Z, Ma T, He X, Zhou J, Ma H, Xie M *et al.* Long intergenic non-coding RNA 00324 promotes gastric cancer cell proliferation via binding with HuR and stabilizing FAM83B expression. *Cell death & disease*2018 Jun 18;9(7):717.
60. Zhao H, Zhang K, Wang T, Cui J, Xi H, Wang Y *et al.* Long non-coding RNA AFAP1-antisense RNA 1 promotes the proliferation, migration and invasion of gastric cancer cells and is associated with poor patient survival. *Oncology letters*2018 Jun;15(6):8620-26.
61. Xu TP, Wang WY, Ma P, Shuai Y, Zhao K, Wang YF *et al.* Upregulation of the long noncoding RNA FOXD2-AS1 promotes carcinogenesis by epigenetically silencing EphB3 through EZH2 and LSD1, and predicts poor prognosis in gastric cancer. *Oncogene*2018 Sep;37(36):5020-36.
62. Liu XJ, Li SL, Li JS, Lu H, Yin LL, Zheng WF *et al.* Long non-coding RNA ZEB1-AS1 is associated with poor prognosis in gastric cancer and promotes cancer cell metastasis. *European review for medical and pharmacological sciences*2018 May;22(9):2624-30.
63. Zhang MH, Yang Y, Zhao Y, Wei HB, Ma YQ, Yang CJ *et al.* LncRNA DQ786243 expression as a biomarker for assessing prognosis in patients with gastric cancer. *European review for medical and pharmacological sciences*2018 Apr;22(8):2304-09.
64. Ye F, Gong Y, Chen X, Yu M, Zuo Z, Pei D *et al.* Long noncoding AFAP1-antisense RNA 1 is upregulated and promotes tumorigenesis in gastric cancer. *Oncology letters*2018 May;15(5):7523-30.
65. Zhang G, Li S, Lu J, Ge Y, Wang Q, Ma G *et al.* LncRNA MT1JP functions as a ceRNA in regulating FBXW7 through competitively binding to miR-92a-3p in gastric cancer. *Molecular cancer*2018 May 2;17(1):87.
66. Zhang Y, Yu S, Zhang Z, Zhao G, Xu J. Long non-coding RNA AK096174 promotes cell proliferation and invasion in gastric cancer by regulating WDR66 expression. *Bioscience reports*2018 Aug 31;38(4).

67. Li L, Wang YY, Mou XZ, Ye ZY, Zhao ZS. Up-regulation of long noncoding RNA M26317 correlates with tumor progression and poor prognosis in gastric cancer. *Hum Pathol*2018 Aug;78:44-53.
68. Dong Y, Wang ZG, Chi TS. Long noncoding RNA Lnc01614 promotes the occurrence and development of gastric cancer by activating EMT pathway. *European review for medical and pharmacological sciences*2018 Mar;22(5):1307-14.
69. Xu Z, Chen H, Yang B, Liu X, Zhou X, Kong H. The Association of HOTAIR with the Diagnosis and Prognosis of Gastric Cancer and Its Effect on the Proliferation of Gastric Cancer Cells. *Canadian journal of gastroenterology & hepatology*2019;2019:3076345.
70. Endo H, Shiroki T, Nakagawa T, Yokoyama M, Tamai K, Yamanami H *et al.* Enhanced expression of long non-coding RNA HOTAIR is associated with the development of gastric cancer. *PLoS one*2013;8(10):e77070.
71. Xu ZY, Yu QM, Du YA, Yang LT, Dong RZ, Huang L *et al.* Knockdown of long non-coding RNA HOTAIR suppresses tumor invasion and reverses epithelial-mesenchymal transition in gastric cancer. *International journal of biological sciences*2013;9(6):587-97.
72. Zhang ZZ, Shen ZY, Shen YY, Zhao EH, Wang M, Wang CJ *et al.* HOTAIR Long Noncoding RNA Promotes Gastric Cancer Metastasis through Suppression of Poly r(C)-Binding Protein (PCBP) 1. *Molecular cancer therapeutics*2015 May;14(5):1162-70.
73. Chen WM, Chen WD, Jiang XM, Jia XF, Wang HM, Zhang QJ *et al.* HOX transcript antisense intergenic RNA represses E-cadherin expression by binding to EZH2 in gastric cancer. *World journal of gastroenterology : WJG*2017 Sep 7;23(33):6100-10.
74. Feng X, Huang S. Effect and mechanism of long noncoding RNAs HOTAIR on occurrence and development of gastric cancer. *Journal of cellular biochemistry*2017 Dec 13.
75. Han MH, Jin W, Zhao CX, Shi JS, Fu JD. Expression of lncrna H19 and SIRT6 in gastric cancer tissues of elderly patients with gastric cancer and their relationship with prognosis. *Chinese Journal of Gerontology*2021;41(2):5.
76. Tian W, Gao AH. Correlation between lncrnaak093987 expression and lymph node metastasis and prognosis of gastric cancer. *Clinical misdiagnosis and mistreatment*2020;33(12):4.
77. Peng M, Ren Y, Yan F, Wu YX. Expression of long-chain non-coding RNA-CECR7 and prognosis in gastric cancer. *Chin Arch Gen Surg (Electronic Edition)* 2020;v.14(06):31-34.
78. Wang Y, Zhu JJ, Liu YY, Li SM, Wang YX, Jie MP *et al.* Expression and clinical significance of lncRNA H19 and lncRNA MEG3 in serum of patients with gastric cancer. *Journal of Chinese Physician*2020;22(11):1619-23,27.
79. Tang LH, Ma J, He Z, Tan L, Xiao WJ. Expression and Clinical Significance of Long Non-Coding RNA SGOL1-AS1 in Gastric Cancer. *Sichuan Medical Journal*2020;41(9):932-37.
80. Zhang L, Wang XY, Wang H. Expression of long non-coding RNA RAB1A-2 in gastric cancer and its function. *Chinese Journal of General Surgery*2020;v.29(08):64-70.
81. Zhong JB, Wang Q, Wei JC, Yang P, Chen ZP, Li WL *et al.* Study on the Relationship between the Expression of Long Non-coding RNA ZDHHC8P1, MEG3, TUG1 and the Clinicopathological Characteristics and Prognosis in Gastric Cancer. *Biomedcnjournalscom Progress in Modern Biomedicine*2020;20(13):2506-11.
82. Wu B, Liu LL, Nie DW. Value of serum lncRNA MIAT, MMP-2 and MMP-9 in diagnosis and prognosis evaluation of gastric cancer. *Int J Lab Med*2020;v.41(12):89-93.
83. Zhang JW, Yu XJ, Z. YY, Guo XZ, Dong MH, Hao ZH. NEAT1 expression in gastric cancer and its correlation with clinicopathological parameters of patients with gastric cancer. *BMU Journal*2020;043(003):178-81.
84. Zhang BY, Xie J, Xiao F, Li M. Level and significance of SATB2-AS1 in gastric cancer tissues. *Chinese Clinical Oncology*2020;25(6):4.
85. Luo HL. Roles and Mechanisms of long noncoding RNA RP11-169F17.1 in Gastric Cancer Tumorigenesis [Dissertation]: Nanchang University; 2020.
86. Li M, Tan SY, Chai H. Expression and clinical significance of long non-coding RNA LOXL1-AS1 in gastric cancer. *Chin J Gastroenterol Hepatol*2020;029(003):328-31.
87. Zhao R. The clinical significance and the mechanism of drug resistance of long non-coding RNA HOTTIP in gastric cancer [Dissertation]: Shandong University; 2019.

88. Zhang CK. [Dissertation]: Medical School PLA; 2018.
89. Feng Y. Effect of LncRNA AFAP1-AS1 on Proliferation and invasion of gastric Cancer cells and its correlation with Clinical prognosis [Dissertation]: Nanjing Medical University; 2018.
90. Hu Y, Wang J, Qian J, Kong X, Tang J, Wang Y *et al.* Long Noncoding RNA GAPLINC Regulates CD44-Dependent Cell Invasiveness and Associates with Poor Prognosis of Gastric Cancer. *Cancer research*2015;13(7):e100-e01.
91. Xu TP, Huang MD, Xia R, Liu XX, Sun M, Yin L *et al.* Decreased expression of the long non-coding RNA FENRR is associated with poor prognosis in gastric cancer and FENRR regulates gastric cancer cell metastasis by affecting fibronectin1 expression. *Journal of Hematology & Oncology*2014;7(1):63.
92. Guo W, Lv P, Liu S, Xu F, Guo Y, Shen S *et al.* Aberrant methylation-mediated downregulation of long noncoding RNA C5orf66-AS1 promotes the development of gastric cardia adenocarcinoma. *Molecular carcinogenesis*2018 Jul;57(7):854-65.
93. Dong Y, Wang ZG, Chi TS. Long noncoding RNA Lnc01614 promotes the occurrence and development of gastric cancer by activating EMT pathway. 2018;22(5):1307-14.
94. Ma H, Ma T, Chen M, Zou Z, Zhang Z. The pseudogene-derived long noncoding RNA SFTA1P suppresses cell proliferation, migration and invasion in gastric cancer. *Biosci Rep*2018;38(2):BSR20171193.
95. Zhao R, Zhang Y, Zhang X, Yang Y, Zheng X, Li X *et al.* Exosomal long noncoding RNA HOTTIP as potential novel diagnostic and prognostic biomarker test for gastric cancer. *Molecular Cancer*2018;17(1):68.
96. Quan Y, Zhang Y, Lin W, Shen Z, Wu S, Zhu C *et al.* Knockdown of long non-coding RNA MAP3K20 antisense RNA 1 inhibits gastric cancer growth through epigenetically regulating miR-375. *Biochemical & Biophysical Research Communications*2018;497(2).
97. Chen JF, Wu P, Xia R, Yang J, Huo XY, Gu DY *et al.* STAT3-induced lncRNA HAGLROS overexpression contributes to the malignant progression of gastric cancer cells via mTOR signal-mediated inhibition of autophagy. *Molecular Cancer*2018;17(1):6.
98. Zhang H, Lu W. LncRNA SNHG12 regulates gastric cancer progression by acting as a molecular sponge of miR-320. *Molecular medicine reports*2018;17(2):2743.
99. Zeng S, Xie X, Xiao YF, Tang B, Hu CJ, Wang SM *et al.* Long noncoding RNA LINC00675 enhances phosphorylation of vimentin on Ser83 to suppress gastric cancer progression. *Cancer letters*2018;412:179-87.
100. Qin QH, Yin ZQ, Li Y, Wang BG, Zhang MF. Long intergenic noncoding RNA 01296 aggravates gastric cancer cells progress through miR-122/MMP-9. *Retour Au Numéro*2017;97:450-57.
101. Wu X, Zhang P, Zhu H, Li S, Chen X, Shi L. Long noncoding RNA FEZF1-AS1 indicates a poor prognosis of gastric cancer and promotes tumorigenesis via activation of Wnt signaling pathway. *Biomedicine & Pharmacotherapy*2017;96:1103-08.
102. Ba MC, Long H, Cui SZ, Gong YF, Yan ZF, Wu YB *et al.* Long noncoding RNA LINC00673 epigenetically suppresses KLF4 by interacting with EZH2 and DNMT1 in gastric cancer. *Oncotarget*2017;8(56):95542-53.
103. Hu Y, Ma Z, He Y, Liu W, Su Y, Tang Z. LncRNA-SNHG1 contributes to gastric cancer cell proliferation by regulating DNMT1. *Biochem Biophys Res Commun*2017;491(4):926.
104. Yan K, Tian J, Shi W, Xia H, Zhu Y. LncRNA SNHG6 is Associated with Poor Prognosis of Gastric Cancer and Promotes Cell Proliferation and EMT through Epigenetically Silencing p27 and Sponging miR-101-3p. *Cellular Physiology & Biochemistry International Journal of Experimental Cellular Physiology Biochemistry & Pharmacology*2017;42(3):999.
105. Hao YP, Qiu JH, Zhang DB, Yu CG. Long non-coding RNA DANCR, a prognostic indicator, promotes cell growth and tumorigenicity in gastric cancer. *Tumour biology : the journal of the International Society for Oncodevelopmental Biology and Medicine*2017;39(6):1010428317699798.
106. Wu SW, Hao YP, Qui JH, Zhang DB, Yu CG, Li HW. High expression of long noncoding RNA CCAT2 indicates poor prognosis of gastric cancer and promotes cell proliferation and invasion.

Minerva Medica2017;108(4).

107. Liu JN, Shangguan YM. Long non-coding RNA CARLo-5 upregulation associates with poor prognosis in patients suffering gastric cancer. *European Review for Medical & Pharmacological Sciences*2017;21(3):530.
108. Huang M, Hou J, Wang Y, Xie M, Wei C, Nie F *et al.* Long Noncoding RNA LINC00673 Is Activated by SP1 and Exerts Oncogenic Properties by Interacting with LSD1 and EZH2 in Gastric Cancer. *Molecular Therapy*2017;25(4):1014.
109. Qi F, Liu X, Wu H, Yu X, Wei C, Huang X *et al.* Long noncoding AGAP2-AS1 is activated by SP1 and promotes cell proliferation and invasion in gastric cancer. *Journal of Hematology & Oncology*2017;10(1):48.
110. Liu YW, Xia R, Lu K, Xie M, Yang F, Sun M *et al.* LincRNAFEZF1-AS1 represses p21 expression to promote gastric cancer proliferation through LSD1-Mediated H3K4me2 demethylation. *Molecular Cancer*2017;16(1):39.
111. Zuo ZK, Gong Y, Chen XH, Ye F, Yin ZM, Gong QN *et al.* TGFβ1-Induced LncRNA UCA1 Upregulation Promotes Gastric Cancer Invasion and Migration. *Dna & Cell Biology*2017;36(2):159-67.
112. Yu Y, Li L, Zheng Z, Chen S, Chen E, Hu Y. Long non - coding RNA linc00261 suppresses gastric cancer progression via promoting Slug degradation. *Journal of Cellular & Molecular Medicine*2017;21(5):955-67.
113. Xu MD, Wang Y, Weng W, Wei P, Qi P, Zhang Q *et al.* A Positive Feedback Loop of IncRNA-PVT1 and FOXM1 Facilitates Gastric Cancer Growth and Invasion. *Clinical Cancer Research An Official Journal of the American Association for Cancer Research*2017;23(8):2071.
114. Zeng M, Zhu L, Kang C. Expression of LncRNA RP11-513G11.1 in human gastric cancer tissues and its clinical significance. *TUMOR*2017.
115. Wang F, Yang LI, Luo Y, Qiulan XU. Long non-coding RNA HOTAIR expression profile in gastric cancer and its relationship between patient prognosis. *Anhui Medical & Pharmaceutical Journal*2017.
116. Feng L, Ying YU, Yue LI, Center T. Expression and clinical significance of LncRNA RAB11B-AS1 in gastric cancer. *Chinese Clinical Oncology*2017.
117. Zou JH, Li CY, Bao J, Zheng GQ. High expression of long noncoding RNA Sox2ot is associated with the aggressive progression and poor outcome of gastric cancer. *European review for medical and pharmacological sciences*2016;20(21):4482-86.
118. Zhao L, Guo H, Zhou B, Feng J, Li Y, Han T *et al.* Long non-coding RNA SNHG5 suppresses gastric cancer progression by trapping MTA2 in the cytosol. *Oncogene*2016;35(44):5770.
119. Sun M, Nie F, Wang Y, Zhang Z, Hou J, He D *et al.* LncRNA HOXA11-AS Promotes Proliferation and Invasion of Gastric Cancer by Scaffolding the Chromatin Modification Factors PRC2, LSD1, and DNMT1. *Cancer research*2016;76(21):6299-310.
120. Chen DL, Ju HQ, Lu YX, Chen LZ, Zeng ZL, Zhang DS *et al.* Long non-coding RNA XIST regulates gastric cancer progression by acting as a molecular sponge of miR-101 to modulate EZH2 expression. *Journal of Experimental & Clinical Cancer Research*2016;35(1):142.
121. Jin C, Shi W, Wang F, Shen X, Qi J, Cong H *et al.* Long non-coding RNA HULC as a novel serum biomarker for diagnosis and prognosis prediction of gastric cancer. *Oncotarget*2016;7(32):51763-72.
122. Nie F, Yu X, Huang M, Wang Y, Xie M, Ma H *et al.* Long noncoding RNA ZFAS1 promotes gastric cancer cells proliferation by epigenetically repressing KLF2 and NKD2 expression. *Oncotarget*2016;8(24).
123. Sun TT, He J, Liang Q, Ren LL, Yan TT, Yu TC *et al.* A novel IncRNA GClnc1 promotes gastric carcinogenesis and may act as a modular scaffold of WDR5 and KAT2A complexes to specify the histone modification pattern. *Cancer Discovery*2016;6(7):784.
124. Ye H, Liu K, Qian K. Overexpression of long noncoding RNA HOTTIP promotes tumor invasion and predicts poor prognosis in gastric cancer. *Oncotargets & Therapy*2016;9(Issue

- 1):2081-88.
125. Fu JW, Ying K, Xu S. Long noncoding RNA NEAT1 is an unfavorable prognostic factor and regulates migration and invasion in gastric cancer. *Journal of Cancer Research & Clinical Oncology*2016;142(7):1571-79.
126. Chao S, Yan G, Zhang J, Huang B. Silence of long noncoding RNA UCA1 inhibits malignant proliferation and chemotherapy resistance to adriamycin in gastric cancer. *Cancer Chemotherapy & Pharmacology*2016;77(5):1061.
127. Yuan CL, Li H, Zhu L, Liu Z, Zhou J, Shu Y. Aberrant expression of long noncoding RNA PVT1 and its diagnostic and prognostic significance in patients with gastric cancer. *Neoplasma*2016;63(3):442.
128. Zhang E, He X, Yin D, Han L, Qiu M, Xu T *et al.* Increased expression of long noncoding RNA TUG1 predicts a poor prognosis of gastric cancer and regulates cell proliferation by epigenetically silencing of p57. *Cell death & disease*2016;7(2):e2109.
129. Zhang E, Yin D, Han L, He X, Si X, Chen W *et al.* E2F1-induced upregulation of long noncoding RNA LINC00668 predicts a poor prognosis of gastric cancer and promotes cell proliferation through epigenetically silencing of CKIs. *Oncotarget*2016;7(17):23212-26.
1230. Ma HW, Xie M, Sun M, Chen TY, Jin RR, Ma TS *et al.* The pseudogene derived long noncoding RNA DUXAP8 promotes gastric cancer cell proliferation and migration via epigenetically silencing PLEKHO1 expression. *Oncotarget*2016;8(32).
131. Ma P, Xu T, Huang M, Shu Y. Increased expression of LncRNA PANDAR predicts a poor prognosis in gastric cancer. *Biomedicine & Pharmacotherapy*2016;78:172-76.
132. Ma B, Wang J, Song Y, Peng G, Sun J, Chen X *et al.* Upregulated long intergenic noncoding RNA KRT18P55 acts as a novel biomarker for the progression of intestinal-type gastric cancer. *Oncotargets & Therapy*2016;9(Issue 1):445.
133. Song W, Liu YY, Peng JJ, Liang HH, Chen HY, Chen JH *et al.* Identification of differentially expressed signatures of long non-coding RNAs associated with different metastatic potentials in gastric cancer. *Journal of Gastroenterology*2016;51(2):119-29.
134. Chen WM, Huang MD, Sun DP, Rong K, Xu TP, Rui X *et al.* Long intergenic non-coding RNA 00152 promotes tumor cell cycle progression by binding to EZH2 and repressing p15 and p21 in gastric cancer. *Oncotarget*2016;7(9):9773-87.
135. Nie FQ, Ma S, Xie M, Liu YW, De W, Liu XH. Decreased long noncoding RNA MIR31HG is correlated with poor prognosis and contributes to cell proliferation in gastric cancer. *Tumor Biology*2016;37(6):7693-701.
136. Chen SX, Yin JF, Lin BC, Su HF, Zheng Z, Xie CY *et al.* Upregulated expression of long noncoding RNA SNHG15 promotes cell proliferation and invasion through regulates MMP2/MMP9 in patients with GC. *Tumor Biology*2016;37(5):6801-12.
137. Meng F, Junli SI, Liu L, Cui J, Yuqin QI, Mei LV *et al.* Expression of long non-coding RNA MEG3 and its relationship with the prognosis of human gastric cancer. *Chinese Journal of Clinical Oncology*2016.
138. Lü MH, Tang B, Zeng S, Hu CJ, Xie R, Wu YY *et al.* Long noncoding RNA BC032469, a novel competing endogenous RNA, upregulates hTERT expression by sponging miR-1207-5p and promotes proliferation in gastric cancer. *Oncogene*2016;35(27):3524-34.
139. Fei ZH, Yu XJ, Zhou M, Su HF, Zheng Z, Xie CY. Upregulated expression of long non-coding RNA LINC00982 regulates cell proliferation and its clinical relevance in patients with gastric cancer. *Tumour biology : the journal of the International Society for Oncodevelopmental Biology and Medicine*2016 Feb;37(2):1983-93.
140. Sun J. The clinical significance and molecular mechanism of long non-coding RNAs AC138128.1、RP11-119F7.4 in gastric cancer. Liaoning: China Medical University (Liaoning); 2016.
141. Chen F, Tian Y, Pang E, Wang Y, Li L. MALAT2-activated long noncoding RNA indicates a biomarker of poor prognosis in gastric cancer. *Cancer Gene Therapy*2015.

142. Chen WM, Huang MD, Kong R, Xu TP, Zhang EB, Xia R *et al.* Antisense Long Noncoding RNA HIF1A-AS2 Is Upregulated in Gastric Cancer and Associated with Poor Prognosis. *Dig Dis Sci*2015;60(6):1655-62.
143. Hu Y, Pan J, Wang Y, Li L, Huang Y. Long noncoding RNA linc-UBC1 is negative prognostic factor and exhibits tumor pro-oncogenic activity in gastric cancer. *International Journal of Clinical & Experimental Pathology*2015;8(1):594-600.
144. Min X, Ming S, Zhu YN, Rui X, Liu YW, Jie D *et al.* Long noncoding RNA HOXA-AS2 promotes gastric cancer proliferation by epigenetically silencing P21/PLK3/DDIT3 expression. *Oncotarget*2015;6(32):33587-601.
145. Lai Y, Xu P, Li Q, Ren D, Wang J, Xu K *et al.* Downregulation of long noncoding RNA ZMAT1 transcript variant 2 predicts a poor prognosis in patients with gastric cancer. *International Journal of Clinical & Experimental Pathology*2015;8(5):5556.
146. Li L, Zhang L, Zhang Y, Zhou F. Increased expression of LncRNA BANCR is associated with clinical progression and poor prognosis in gastric cancer. *Biomedicine & Pharmacotherapy*2015;72:109-12.
147. Liu Y, Sun M, Xia R, Zhang E, Liu X, Zhang Z *et al.* LincHOTAIR epigenetically silences miR34a by binding to PRC2 to promote the epithelial-to-mesenchymal transition in human gastric cancer. *Cell death & disease*2015;6(7):e1802.
148. Kong R, Zhang E, Yin D, You L, Xu T, Chen W *et al.* Long noncoding RNA PVT1 indicates a poor prognosis of gastric cancer and promotes cell proliferation through epigenetically regulating p15 and p16. *Molecular Cancer*,14,1(2015-04-12)2015;14(1):82.
149. Peng Q, Mi-Die X, Xiao-Han S, Shu-Juan N, Dan H, Cong T *et al.* Reciprocal repression between TUSC7 and miR-23b in gastric cancer. *International Journal of Cancer Journal International Du Cancer*2015;137(6):1269-78.
150. Peng W, Wu G, Fan H, Wu J, Feng J. Long noncoding RNA SPRY4-IT1 predicts poor patient prognosis and promotes tumorigenesis in gastric cancer. *Tumour Biology the Journal of the International Society for Oncodevelopmental Biology & Medicine*2015;36(9):6751-58.
151. Saito T, Kurashige J, Nambara S, Komatsu H, Hirata H, Ueda M *et al.* A Long Non-coding RNA Activated by Transforming Growth Factor- $\beta$  is an Independent Prognostic Marker of Gastric Cancer. *Annals of surgical oncology*2015;22(3):915-22.
152. Sun T. The role of TMEFF2 and long non-coding RNA GAS1 in gastric carcinoma. Shanghai: Shanghai Jiao Tong University; 2015.
153. Wang CY, Hua L, Yao KH, Chen JT, Zhang JJ, Hu JH. Long non-coding RNA CCAT2 is up-regulated in gastric cancer and associated with poor prognosis. *International Journal of Clinical & Experimental Pathology*2015;8(1):779-85.
154. Zhao W, Dong S, Duan B, Chen P, Shi L, Gao H *et al.* HOTAIR is a predictive and prognostic biomarker for patients with advanced gastric adenocarcinoma receiving fluorouracil and platinum combination chemotherapy. *American Journal of Translational Research*2015;7(7):1295-302.
155. Zheng Q, Wu F, Dai WY, Zheng DC, Zheng C, Ye H *et al.* Aberrant expression of UCA1 in gastric cancer and its clinical significance. *Clinical & Translational Oncology*2015;17(8):640-46.
156. Wang Q. Apreliminary function study of lncRNA GC240 in gastric cancer about clinical phenotype and prognosis. Nanjing: Nanjing Medical University; 2015.
157. Wang Y, Zhang D, Wu K, Zhao Q, Nie Y, Fan D. Long Noncoding RNA MRUL Promotes ABCB1 Expression in Multidrug-Resistant Gastric Cancer Cell Sublines. *Molecular & Cellular Biology*2014;34(17):3182.
158. Sun M, Jin F, Xia R, Kong R, Li J, Xu T *et al.* Decreased expression of long noncoding RNA GAS5 indicates a poor prognosis and promotes cell proliferation in gastric cancer. *BMC Cancer*,14,1(2014-05-06)2014;14(1):319.
159. Li H, Yu B, Li J, Su L, Yan M, Zhu Z *et al.* Overexpression of lncRNA H19 enhances carcinogenesis and metastasis of gastric cancer. *Oncotarget*2014;5(8):2318-29.



160. Zhang EB, Kong R, Yin DD, You LH, Sun M, Han L *et al.* Long noncoding RNA ANRIL indicates a poor prognosis of gastric cancer and promotes tumor growth by epigenetically silencing of miR-99a/miR-449a. *Oncotarget*2014;5(8):2276-92.
161. Liu XH, Sun M, Nie FQ, Ge YB, Zhang EB, Yin DD *et al.* Lnc RNA HOTAIR functions as a competing endogenous RNA to regulate HER2 expression by sponging miR-331-3p in gastric cancer. *Molecular Cancer*2014;13(1):92.
162. Zhang EB, Han L, Yin DD, Kong R, Wei D, Chen J. c-Myc-induced, long, noncoding H19 affects cell proliferation and predicts a poor prognosis in patients with gastric cancer. *Medical Oncology*2014;31(5):1-8.
163. Zhou B, Jing XY, Wu JQ, Xi HF, Lu GJ. Down-regulation of long non-coding RNA LET is associated with poor prognosis in gastric cancer. *International journal of clinical and experimental pathology*2014;7(12):8893-98.
164. Xu MD, Qi P, Weng WW, Shen XH, Ni SJ, Dong L *et al.* Long Non-Coding RNA LSINCT5 Predicts Negative Prognosis and Exhibits Oncogenic Activity in Gastric Cancer. *Medicine*2014;93(28):e303.
165. Okugawa Y, Toiyama Y, Hur K, Toden S, Saigusa S, Tanaka K *et al.* Metastasis-associated long non-coding RNA drives gastric cancer development and promotes peritoneal metastasis. *Carcinogenesis*2014;35(12):2731-9.
166. Zhang Z. The expression and biological function of long non-coding RNA linc00628 in gastric cancer. Shanghai: Shanghai Jiao Tong University; 2014.
167. Yang F, Xue X, Zheng L, Bi J, Zhou Y, Zhi K *et al.* Long non-coding RNA GHET1 promotes gastric carcinoma cell proliferation by increasing c-Myc mRNA stability. *Febs Journal*2014;281(3):802-13.
168. Sun M, Xia R, Jin F, Xu T, Liu Z, De W *et al.* Downregulated long noncoding RNA MEG3 is associated with poor prognosis and promotes cell proliferation in gastric cancer. *Tumour biology : the journal of the International Society for Oncodevelopmental Biology and Medicine*2014;35(2):1065-73.
169. Park SM, Park SJ, Kim HJ, Kwon OH, Kang TW, Sohn HA *et al.* A known expressed sequence tag, BM742401, is a potent lincRNA inhibiting cancer metastasis. *Experimental & Molecular Medicine*2013;45(7):e31.
